# Supplementary material for: MicroRNA‐302c‐3p inhibits endothelial cell pyroptosis via directly targeting NOD‐, LRR‐ and pyrin domain‐containing protein 3 in atherosclerosis
Source: PubMed Central journal article supplement (PMC8093969; doi:10.1111/jcmm.16500), 2021-03-30

A

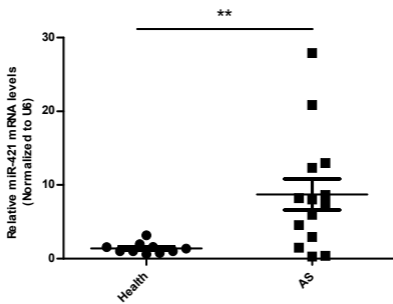

B

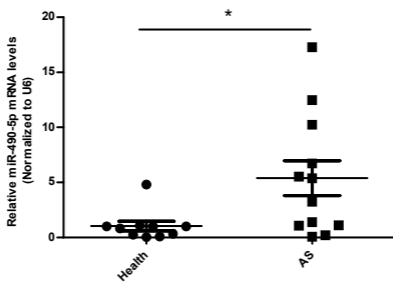

C

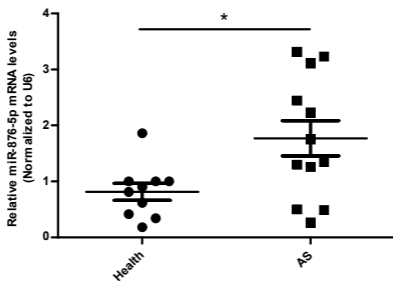

Supplement: JCMM-25-4373-s001.pdf [file JCMM-25-4373-s001.pdf]
